# Supplementary material
Source: publisher figshare collection journal article supplement (https://acs.figshare.com/ndownloader/files/3809971)
Supplement: Supplementary file 1 [file 3809971]

Supporting Information for:

## **Engineering Bacterial Microcompartment Shells: Chimeric Shell Proteins and Chimeric Carboxysome Shells**

**Fei Cai,<sup>†,§</sup> Markus Sutter,<sup>§,||</sup> Susan L. Bernstein,<sup>†,§</sup> James N. Kinney,<sup>§</sup> and Cheryl A. Kerfeld<sup>\*,†,‡,§,||</sup>**

<sup>†</sup>Department of Plant and Microbial Biology, <sup>‡</sup>Synthetic Biology Institute, University of California, Berkeley, California 94720, United States

<sup>§</sup>Physical Biosciences Division, Lawrence Berkeley National Laboratory, Berkeley, California 94720, United States

<sup>||</sup>MSU-DOE Plant Research Laboratory, Michigan State University, East Lansing, Michigan 48824, United States

Include:

Figure S1      Crystal packing of the CsoS1, CcmK2 and CcmK4 structures.

The structures are shown in a cartoon representation. CsoS1 (orange) forms strips, and the area in the red-dashed-line from the left panel is shown after 90 degree rotation in the right panel. Both CcmK2 (cyan) and CcmK4 (magenta) form layers. The middle layer of the CcmK4 is in a lighter color.

Figure S2      Visualization of yellow fluorescent protein (YFP) expressed in *wildtype* *Synechococcus elongatus* PCC 7942.

Wild-type cells containing free yellow fluorescent protein were visualized using fluorescent microscopy under same growth conditions as shown in Figure 4. The chlorophyll-a (Chl-a) channel was used as a marker to identify the cell outline. Scale bar equals 2  $\mu$ m.

Table S1      Comparison of interface between two adjacent hexamers.

Table S2      Strains and plasmids used in this study.

Table S3      Oligonucleotides used in cloning and segregation analysis.

# Supporting Information

CsoS1( $\alpha$ )

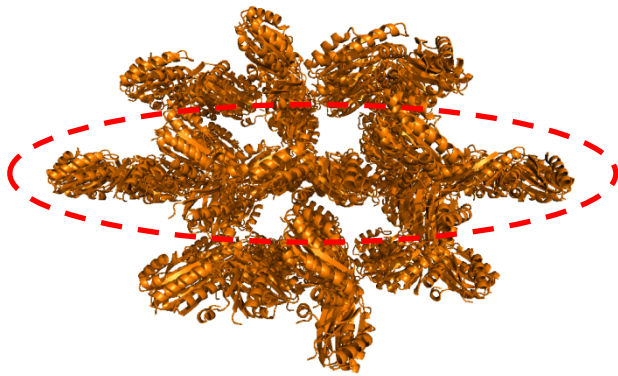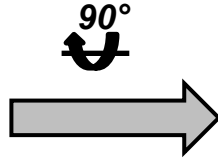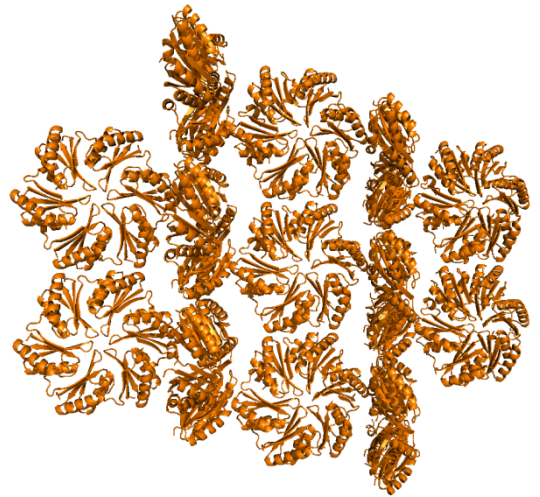

CcmK2 ( $\beta$ )

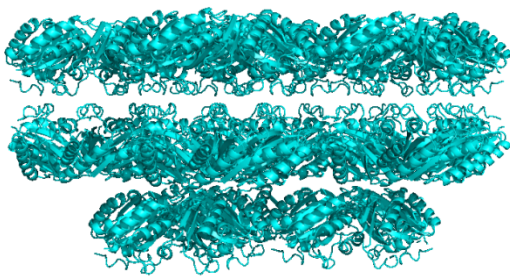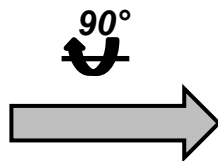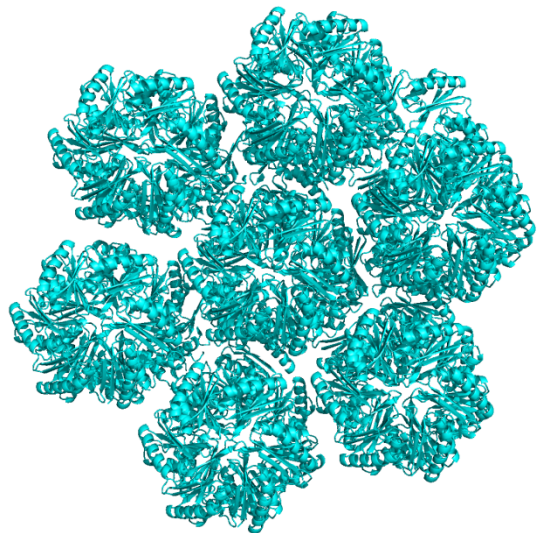

CcmK4 ( $\beta$ )

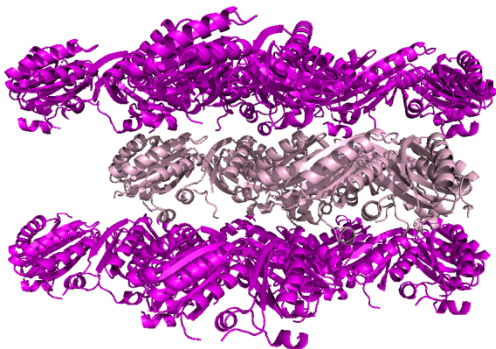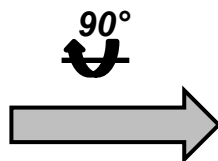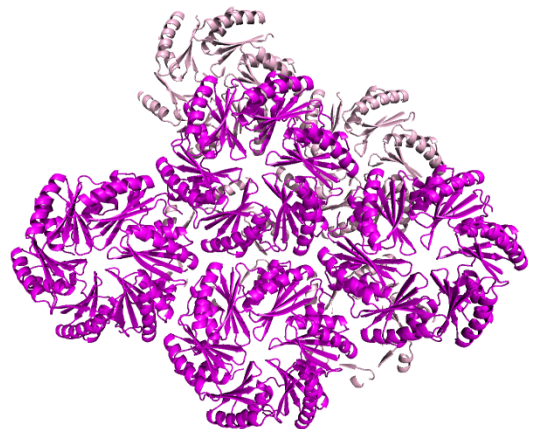

Figure S1

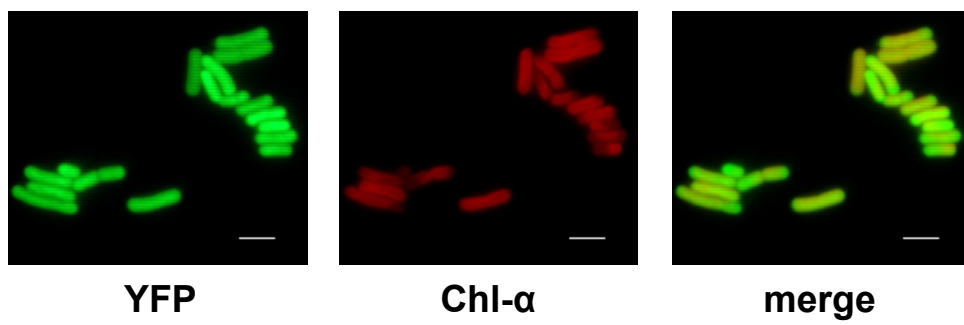

**Figure S2**

Table S1

Comparison of interface between two adjacent hexamers.

| interface of two adjacent hexamers | Shape Complementarity |                                                | interaction per edge |                                  |                         |                       |
|------------------------------------|-----------------------|------------------------------------------------|----------------------|----------------------------------|-------------------------|-----------------------|
|                                    | Sc                    | Area included in calculation (Å <sup>2</sup> ) | number of residues   | interface area (Å <sup>2</sup> ) | number of hydrogen bond | number of salt bridge |
| <i>Pro9313</i> CsoS1 (4OX8)        | 0.715                 | 342 : 335                                      | 22 : 20              | 708 : 708                        | 10                      | 1                     |
| <i>Syn7942</i> CcmK2 (4OX7)        | 0.690                 | 26 : 31                                        | 5 : 6                | 172 : 172                        | 3                       | 6                     |
| <i>Syn7942</i> CcmK4 (4OX6)        | 0.625                 | 434 : 455                                      | 23 : 22              | 851 : 851                        | 18                      | 5                     |

**Table S2.** Strains and plasmids used in this study.

| Strain or plasmid                                          | Description                                                                                                                                                    | Resistance | Reference                              |
|------------------------------------------------------------|----------------------------------------------------------------------------------------------------------------------------------------------------------------|------------|----------------------------------------|
| <i>Synechococcus elongatus</i> 7942 strains                |                                                                                                                                                                |            |                                        |
| WT                                                         | Wild-type <i>Synechococcus elongatus</i> 7942                                                                                                                  |            | (Allen and Stanier, 1968)              |
| $\Delta K2::Kan^R$                                         | Deletion of <i>ccmK2</i> gene with kanamycin cassette                                                                                                          | Kan        | This work                              |
| <i>HIND</i>                                                | Disruption of <i>ccmK2</i> gene with chloramphenicol cassette                                                                                                  | Cam        | (Price et al., 1993; Rae et al., 2012) |
| WT/CcmK2-YFP                                               | WT strain transformed with pJCC009                                                                                                                             | Spec       | (Cameron et al., 2013)                 |
| WT/CcmK2 <sup>pmK4</sup> -YFP                              | WT strain transformed with pFC143                                                                                                                              | Spec       | This work                              |
| WT/CcmK2 <sup>pm<math>\alpha</math></sup> -YFP             | WT strain transformed with pFC144                                                                                                                              | Spec       | This work                              |
| WT/CcmK4-YFP                                               | WT strain transformed with pFC147                                                                                                                              | Spec       | This work                              |
| WT/CcmK4 <sup>pmK2</sup> -YFP                              | WT strain transformed with pFC148                                                                                                                              | Spec       | This work                              |
| WT/CsoS1-YFP                                               | WT strain transformed with pFC149                                                                                                                              | Spec       | This work                              |
| $\Delta K2::Kan^R$ /CcmK2                                  | $\Delta K2::Kan^R$ strain transformed with pFC114                                                                                                              | Cam/Kan    | This work                              |
| $\Delta K2::Kan^R$ /CcmK2 <sup>pmK4</sup>                  | $\Delta K2::Kan^R$ strain transformed with pFC128                                                                                                              | Cam/Kan    | This work                              |
| $\Delta K2::Kan^R$ /CcmK2 <sup>pm<math>\alpha</math></sup> | $\Delta K2::Kan^R$ strain transformed with pFC129                                                                                                              | Cam/Kan    | This work                              |
| $\Delta K2::Kan^R$ /CcmK3                                  | $\Delta K2::Kan^R$ strain transformed with pFC131                                                                                                              | Cam/Kan    | This work                              |
| $\Delta K2::Kan^R$ /CcmK4                                  | $\Delta K2::Kan^R$ strain transformed with pFC132                                                                                                              | Cam/Kan    | This work                              |
| $\Delta K2::Kan^R$ /CcmK4 <sup>pmK2</sup>                  | $\Delta K2::Kan^R$ strain transformed with pFC133                                                                                                              | Cam/Kan    | This work                              |
| $\Delta K2::Kan^R$ /CsoS1                                  | $\Delta K2::Kan^R$ strain transformed with pFC134                                                                                                              | Cam/Kan    | This work                              |
| Plasmids                                                   |                                                                                                                                                                |            |                                        |
| pUC19                                                      | <i>E. coli</i> cloning vector                                                                                                                                  | Amp        | (Yanisch-Perron et al., 1985)          |
| pAM2314                                                    | <i>Syn7942</i> Neutral site I transformation vector                                                                                                            | Spec       | (Mackey et al., 2007)                  |
| pPMS2314                                                   | Modified from pAM2314 to contain BglBrick restriction sites                                                                                                    | Spec       | (Cameron et al., 2013)                 |
| pCR-Blunt II-TOPO                                          | <i>E. coli</i> PCR cloning vector                                                                                                                              | Kan        | Invitrogen                             |
| pUH3.7                                                     | pCR-Blunt II-TOPO that contain the origind of <i>Syn7942</i> endogenous plasmid pUH24 (a <i>XhoI</i> / <i>BglIII</i> cut 3.7 kb fragment).                     | Kan        | This work                              |
| pSyEc1                                                     | Modified from pUH3.7 to contain endogenous promoter of <i>Syn7942 ccmK2</i> gene                                                                               | Cam        | This work                              |
| pGS020                                                     | pUC19 backbone with kanamycin cassette flanked by <i>ccmK2</i> upstream and downstream sequence (EcoRI/SacI/XbaI/HindIII) for generation of $\Delta K2::Kan^R$ | Amp/Kan    | This work                              |
| pJCC009                                                    | <i>P<sub>ccmK2</sub>::ccmK2::YFP</i> cloned into pPMS2314 at <i>EcoRI</i> and <i>BamHI</i> sites                                                               | Spec       | (Cameron et al., 2013)                 |
| pFC143                                                     | <i>P<sub>ccmK2</sub>::ccmK2<sup>pmK4</sup>::YFP</i> cloned into pAM2314 at <i>EcoRI</i> and <i>BamHI</i> sites                                                 | Spec       | This work                              |
| pFC144                                                     | <i>P<sub>ccmK2</sub>::ccmK2<sup>pm<math>\alpha</math></sup>::YFP</i> cloned into pAM2314 at <i>EcoRI</i> and <i>BamHI</i> sites                                | Spec       | This work                              |
| pFC147                                                     | <i>P<sub>ccmK2</sub>::ccmK4::YFP</i> cloned into pAM2314 at <i>EcoRI</i> and <i>BamHI</i> sites                                                                | Spec       | This work                              |
| pFC148                                                     | <i>P<sub>ccmK2</sub>::ccmK4<sup>pmK2</sup>::YFP</i> cloned into pAM2314 at <i>EcoRI</i> and <i>BamHI</i> sites                                                 | Spec       | This work                              |
| pFC149                                                     | <i>P<sub>ccmK2</sub>::csoS1::YFP</i> cloned into pAM2314 at <i>EcoRI</i> and <i>BamHI</i> sites                                                                | Spec       | This work                              |
| pFC114                                                     | <i>P<sub>ccmK2</sub>::ccmK</i> cloned into pSyEc1 at <i>SmaI</i> site                                                                                          | Cam        | This work                              |
| pFC128                                                     | <i>P<sub>ccmK2</sub>::ccmK2<sup>pmK</sup></i> cloned into pSyEc1 at <i>SmaI</i> site                                                                           | Cam        | This work                              |
| pFC129                                                     | <i>P<sub>ccmK2</sub>::ccmK2<sup>pm<math>\alpha</math></sup></i> cloned into pSyEc1 at <i>SmaI</i> site                                                         | Cam        | This work                              |
| pFC131                                                     | <i>P<sub>ccmK2</sub>::ccmK3</i> cloned into pSyEc1 at <i>SmaI</i> site                                                                                         | Cam        | This work                              |
| pFC132                                                     | <i>P<sub>ccmK2</sub>::ccmK4</i> cloned into pSyEc1 at <i>SmaI</i> site                                                                                         | Cam        | This work                              |
| pFC133                                                     | <i>P<sub>ccmK2</sub>::ccmK4<sup>pmK2</sup></i> cloned into pSyEc1 at <i>SmaI</i> site                                                                          | Cam        | This work                              |
| pFC134                                                     | <i>P<sub>ccmK2</sub>::csoS1</i> cloned into pSyEc1 at <i>SmaI</i> site                                                                                         | Cam        | This work                              |

**Table S3.** Oligonucleotides used in cloning and segregation analysis.

| <b>ID</b>                                        | <b>Name</b>     | <b>Sequence</b>                                                 |
|--------------------------------------------------|-----------------|-----------------------------------------------------------------|
| <i>Genomic integration/segregation</i>           |                 |                                                                 |
| FC0340                                           | Pk2-46f         | 5'-GCT TCT TGC TAG AGA CTG ACT-3'                               |
| FC0152                                           | ccmL902r        | 5'-CGATGATGGCAATGACAGC-3'                                       |
| <i>Fluorescent proteins</i>                      |                 |                                                                 |
| FC0327                                           | Pccmk2-EcoRI-f  | 5'-TAAGAATCCGCTCGCGGCA TCAGCACCAA GTG-3'                        |
| FC0328                                           | K2-BamHI-r      | 5'-GGCGAATCCTTACATGCGG AATTGTTCAA CAGC-3'                       |
| FC0329                                           | K3-BamHI-r      | 5'-GCAGAATCCTTAAGACCGA AAGGGCTCGG ATTC-3'                       |
| FC0330                                           | K4-BamHI-r      | 5'-TAAGAATCCTTAACGGCGG CCACTACCAG TTCC-3'                       |
| FC0331                                           | P_N-BamHI-r     | 5'-GCAGAATCCTTATCCCAGA GCAGAGAGAA CGGC-3'                       |
| FC0332                                           | P_C-BamHI-r     | 5'-TAAGAATCCCTACTCCCGC GAGCGATCGC-3'                            |
| FC0333                                           | PMT1206-BamHI-r | 5'-GCAGAATCCTCAGTCCTTC TGACCTAAGA AATTGCCG-3'                   |
| <i>BMC proteins for complementary experiment</i> |                 |                                                                 |
| FC0334                                           | K2pmFWD         | 5'-GGT TGG CTA Tat gcg tgc TGG CAG CGG CCG CGT CAC TG-3'        |
| FC0335                                           | K2pmREV         | 5'-GCC GCT GCC Agc acg cat ATA GCC AAC CAG CGT GAC AC-3'        |
| FC0336                                           | K2alphaFWD      | 5'-GCT GGT TGG Ccg tga gtt cgt cGG CAG CGG CCG CGT CAC TGT C-3' |
| FC0337                                           | K2alphaREV      | 5'-GGC CGC TGC Cga cga act cac gGC CAA CCA GCG TGA CAC GCG -3'  |
| FC0338                                           | K4pmFWD         | 5'-CGA TTG TGA GCT ACg aga aga tCG GTA GCG CTC GCT TTG CAG -3'  |
| FC0339                                           | K4pmREV         | 5'-CGA GCG CTA CCG atc ttc tcG TAG CTC ACA ATC GTG ATT CGG -3'  |
| FC0394                                           | uniFWD          | 3'                                                              |
| FC0395                                           | uniREV          | 5'- CGAGGCCTACTAGTGGATCCCCGAGTCAGTGAGCGAGGAAGC-3'               |
